# Supplementary material
Source: publisher figshare collection journal article supplement (https://acs.figshare.com/ndownloader/files/4666843)
Supplement: Supplementary file 1 [file 4666843]

### Supporting Information 1.

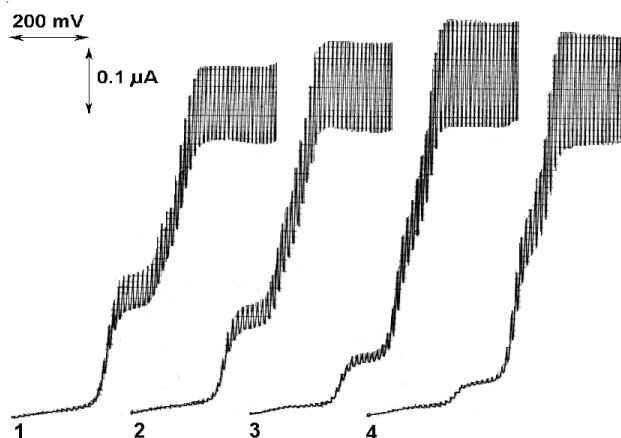

Reaction of isophthalaldehyde with ammonia. Polarographic i-E curves in solutions pH 9.3 containing 0.1 mM isophthalaldehyde and varying concentration of ammonia – ammonium chloride buffer. Concentrations of  $\text{NH}_3$ : (1) 3.0 M, (2) 2.0 M, (3) 1.0 M, (4) 0.5 M with a starting potential of -0.5 V. Most positive wave of imine increases, two waves of the dialdehyde decrease.

### Supporting Information 2.

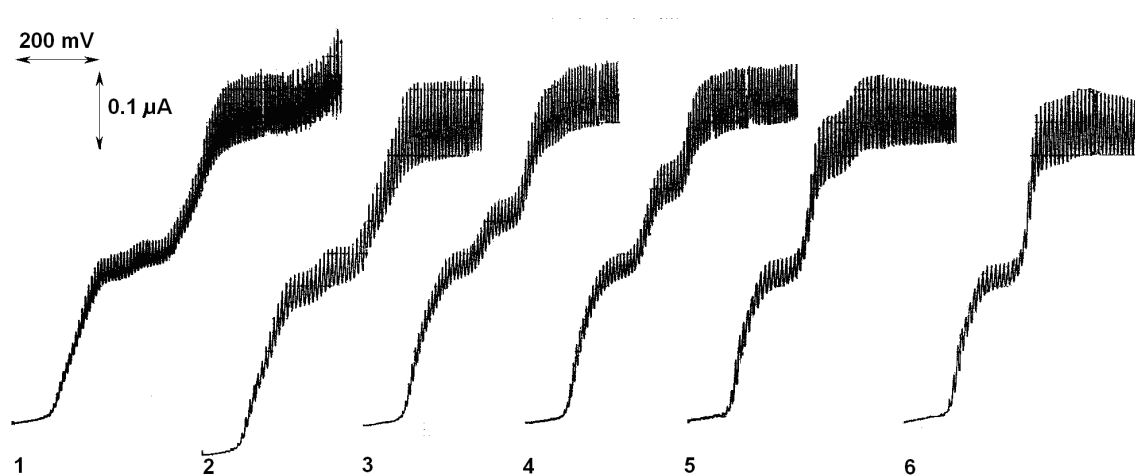

Reaction of terephthalaldehyde with 2-aminoethanol. Polarographic i-E curves in solutions of pH 9.5 containing 0.1 mM terephthalaldehyde and varying concentration of

2-aminoethanol ( $\text{RNH}_2$ ) buffer at a starting potential of  $-0.6$  V. Concentrations of  $\text{RNH}_2$ :

(1)  $0.316$  mM, (2)  $1.00$  mM, (3)  $3.16$  mM, (4)  $10.0$  mM, (5)  $31.6$  mM, (6)  $100$  mM.

Wave of the reduction product  $i_2'$  increases with increasing concentration of the amine.

### Supporting Information 3.

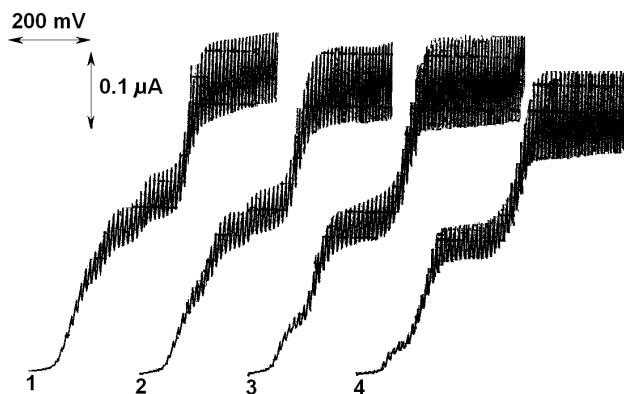

Reaction of terephthalaldehyde with ammonia. Polarographic i-E curves in solutions of pH 9.3 containing  $0.1$  mM terephthalaldehyde and varying concentration of ammonia – ammonium chloride buffer. Concentrations of  $\text{NH}_3$ : (1)  $3.0$  M, (2)  $2.0$  M, (3)  $1.0$  M, (4)  $0.5$  M with a starting potential of  $-0.5$  V. Most positive wave  $i_1'$  of reduction of the monoimine increases with increasing concentration of  $\text{NH}_3$ . At highest  $[\text{NH}_3]$ , curves 2 and 1, wave  $i_2'$  of the imine of reduction products start to increase.
